# Supplementary material
Source: MDPI journal article supplement (https://www.mdpi.com/2077-1444/7/4/40)
Supplement: s1 [file s1]

# Moral and Cultural Awareness in Emerging Adulthood: Preparing for Multi-Faith Workplaces. *Religions* 7 (2016): 40

Patricia Snell Herzog \*, De Andre' T. Beadle, Daniel E. Harris, Tiffany E. Hood and Sanjana Venugopal

Department of Physics, University of Arkansas, Fayetteville, AR 72701, USA; dbeadle@uark.edu (D.A.T.B.), dharris@walton.uark.edu (D.E.H.), temiller@uark.edu (T.E.H.), svenugop@uark.edu (S.V.)

\* Correspondence: herzog@uark.edu; Tel. +1-479-575-3779

Academic Editor: John Bartkowski

Received: 29 January 2016; Accepted: 11 April 2016; Published: 15 April 2016

**Tyson Center for Faith & Spirituality in the Workplace Moral Leadership Survey with National Study of Youth & Religion—Survey Questions (Wave 3 & 4) University of Arkansas—Spring 2015**

1. Some people say that morals are relative, that there are no definite rights and wrongs for everybody. Do you strongly agree, agree, disagree, or strongly disagree?
  1. Strongly agree
  2. Agree
  3. Neither agree nor disagree
  4. Disagree
  5. Strongly disagree
2. Some people believe that it is sometimes okay to break moral rules if it works to your advantage and you can get away with it. Do you strongly agree, agree, disagree, or strongly disagree? (1–5 agree Likert)
3. Some people say that the world is always changing and we should adjust our views of what is morally right and wrong to reflect those changes. (Do you strongly agree, agree, disagree, or strongly disagree?)? (1–5 agree Likert)
4. If you were unsure of what was right or wrong in a particular situation, how would you decide what to do? Would you most likely...
  - a. do what would make you feel happy;
  - b. do what would help you to get ahead;
  - c. follow the advice of a parent or teacher, or other adult you respect; or
  - d. do what you think God or the scripture tells you is right?
5. Please rate how much you agree or disagree with the following statements. (1–5 agree Likert for each question below)
  - a. It is foolish to tell the truth when big profits can be made by lying.
  - b. Regardless of concerns about principles, in today's world you have to be practical, adapt to opportunities, and do what is most advantageous for you.
  - c. The reason it is important to tell the truth is because of what others will do to you if you don't, not because of any issue of right and wrong.
  - d. The true test of character is a willingness to stand by one's principles, no matter what price one has to pay.
  - e. There are no principles worth dying for.
  - f. If one believes something is right, one must stand by it, even if it means losing friends or

- missing out on profitable opportunities.
- g. Lying is sometimes necessary to accomplish important, worthwhile goals.
  - h. If done for the right reasons, even lying or cheating are OK.
  - i. One's principles should not be compromised regardless of possible gain.
  - j. Some transgressions are wrong and cannot be legitimately justified or defended regardless of how much one tries.
6. How much do you agree with the following statements? (1–5 agree Likert ea.)
- a. Right and wrong should be based on God's law.
  - b. American children should be raised to believe in God.
  - c. Moral standards should be seen as individualistic: what one person considers to be moral may be judged as immoral by another person.
  - d. Questions of what is ethical for everyone can never be resolved because what is moral or immoral is up to the individual to decide.
  - e. Moral standards are simply personal rules that indicate how a person should behave, and should not be used when making judgments of others.
7. When you decide whether something is right or wrong, to what extent are the following considerations relevant to your thinking? (1–5 important Likert ea.)
- a. Whether or not someone suffered emotionally
  - b. Whether or not some people were treated differently than others
  - c. Whether or not someone's actions showed love for his or her country
  - d. Whether or not someone showed a lack of respect for authority
  - e. Whether or not someone violated standards of purity and decency
  - f. Whether or not someone was good at math
  - g. Whether or not someone cared for someone weak or vulnerable
  - h. Whether or not someone acted unfairly
  - i. Whether or not someone did something to betray his or her group
  - j. Whether or not someone conformed to the traditions of society
  - k. Whether or not someone did something disgusting
- 1. Extremely important;
  - 2. Very important;
  - 3. Somewhat important;
  - 4. Not very important; or
  - 5. Not important at all?
8. Which of the following statements BEST describes your understanding of evil?
- a. Evil is whatever limits self-expression and personal growth
  - b. Evil is whatever limits human progress and the advance of knowledge
  - c. Evil is whatever keeps people from making their own decisions and living their own lives
  - d. Evil is whatever hurts someone or causes them to suffer
  - e. Evil is whatever goes against God's will and purpose
9. Religion is a private matter that should be kept out of public debates about social and political issues. To what extent do you agree or disagree? (1–5 agree scale)
10. How important or unimportant is religious faith in shaping how you live your daily life? (1–5 important scale)
11. I have very positive feelings about the religious tradition in which I was raised (1–5 agree scale)

### TCFSW-Moral Leadership Course Questions

12. How much do you agree or disagree with the following statements...(1–5 agree scale for each)

- a. I have a clear understanding of my faith (core beliefs) and values.
- b. I am confident that I could articulate my beliefs and values accurately and respectfully in the workplace.
- c. I know quite a bit about other cultures, religions, and world views.
- d. I am able to manage my stress and my emotions quite well.
- e. I believe that I am quite good at managing conflicts with others or between others.

13. When facing difficult life decisions I rely PRIMARILY on...?

- a. My framework of beliefs and values.
- b. What feels right to me at the time.
- c. The views of my friends.
- d. The views of my parents.
- e. What benefits me most in the short to medium term.

14. I have written a Personal Mission Statement that states my key principles and values and then connects them to goals and a plan of action.

- a. Yes, I have written a personal statement that included my principles and values.
- b. I have written a personal mission statement, but it did not include my principles and values.
- c. No, I have never written a personal mission statement.

15. For this question, please indicate the extent to which you agree or disagree with the below statement, as well as an explanation of your response.

- a. I have a good sense of what gives my life meaning and purpose. (1–5 agree scale)
- b. Please explain your response. (short answer)

16. For this question, please indicate how easy or difficult it is for you to do the below statement, as well as an explanation of your response.

- a. I can identify my top five values.
  - 1. Easily
  - 2. With some thought
  - 3. After quite a bit of thought
  - 4. With difficulty
  - 5. Not at all
- b. Please explain your response. (short answer)

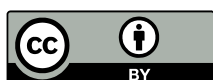

© 2016 by the authors; licensee MDPI, Basel, Switzerland. This article is an open access article distributed under the terms and conditions of the Creative Commons by Attribution (CC-BY) license (<http://creativecommons.org/licenses/by/4.0/>).
